# Supplementary material
Source: PubMed Central journal article supplement (PMC5464403)
Supplement: NIHMS852335-supplement-1.pdf [file NIHMS852335-supplement-1.pdf]

## Supplementary data

**Table 1 Antibodies used in this study**

| <b>Vender</b>                                                | <b>Conjugated Antibodies</b> | <b>Clone</b> |
|--------------------------------------------------------------|------------------------------|--------------|
| <b>Tonbo Biosciences</b><br><b>(San Diego, CA. USA)</b>      | CD3 PE-Cy7                   | UCHT1        |
|                                                              | CD4 PE                       | OKT4         |
|                                                              | CD8 APC                      | OKT8         |
|                                                              | CD19 PE-Cy7                  | HIB19        |
| <b>Biolegend</b><br><b>(San Diego, CA USA)</b>               | CD45RA APC-Cy7               | H100         |
|                                                              | CD45RO Pacific Blue          | UCHL1        |
|                                                              | CCR7 APC                     | G043H7       |
|                                                              | CXCR3 Brilliant Violet 421™  | G025H7       |
|                                                              | CD161-FITC                   | HP-3G10      |
|                                                              | CCR6 Per CP-Cy5.5            | G034E37      |
|                                                              | CD25 Alexa Fluor® 488        | BC96         |
|                                                              | CD56 Brilliant Violet 421™   | HCD56        |
|                                                              | CD69 Brilliant Violet 510™   | FN30         |
|                                                              | CD4Brilliant Violet 510™     | OKT4         |
|                                                              | CD4 Pacific Blue             | OKT4         |
| <b>BD Biosciences</b><br><b>(San Diego, CA. USA)</b>         | IL-4 APC                     | 8D4-8        |
|                                                              | CD14 APC-Cy7                 | MφP9         |
|                                                              | TCR <sub>αβ</sub> FITC       | T10B9.1A-31  |
|                                                              | CCR3 Horizon™ BV510          | 5E8          |
| <b>eBiosciences</b><br><b>(San Diego, CA. USA)</b>           | CCR6 PE                      | 11A9 (RUO)   |
|                                                              | Fox P3 PE                    | PCH101       |
|                                                              | Ki67 eFluor® 450             | 20Raj1       |
|                                                              | IL-17A PE                    | SHLR17       |
| <b>Thermo Fisher/Invitrogen</b><br><b>(Waltham, MA. USA)</b> | IL-17F PE                    | eBio64CAP17  |
|                                                              | IFN <sub>γ</sub> FITC        | B27          |

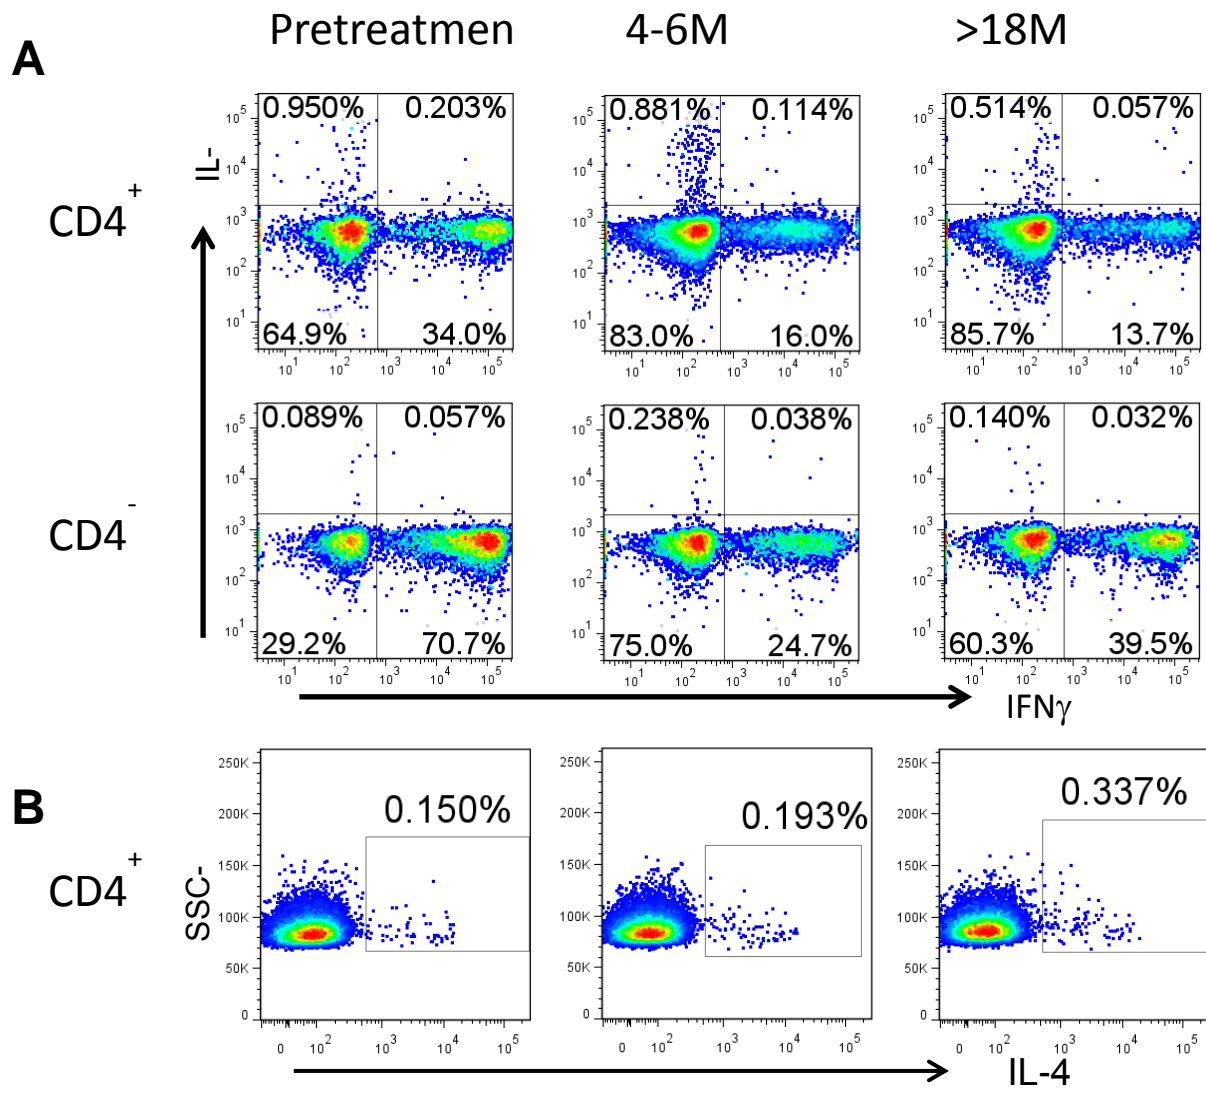

**Figure 1: DMF effect on ex vivo IFN $\gamma$ , IL-17 and IL-4 production by T cells (A)** Representative FACS profile of IFN $\gamma$  and IL-17 (IL-17A and IL-17F) expression on 6hr PMA/ ionomycin-activated CD4<sup>+</sup> (upper) and CD4<sup>-</sup> (lower) T cells from patients before (left hand), 6 month (middle) or 24 month after DMF treatment (right hand). **(B)** Representative FACS profile of IL-4 expression on ex vivo CD4<sup>+</sup> T cells from a MS patient before (left hand), 6 month (middle) and 26 month after DMF treatment (right hand).

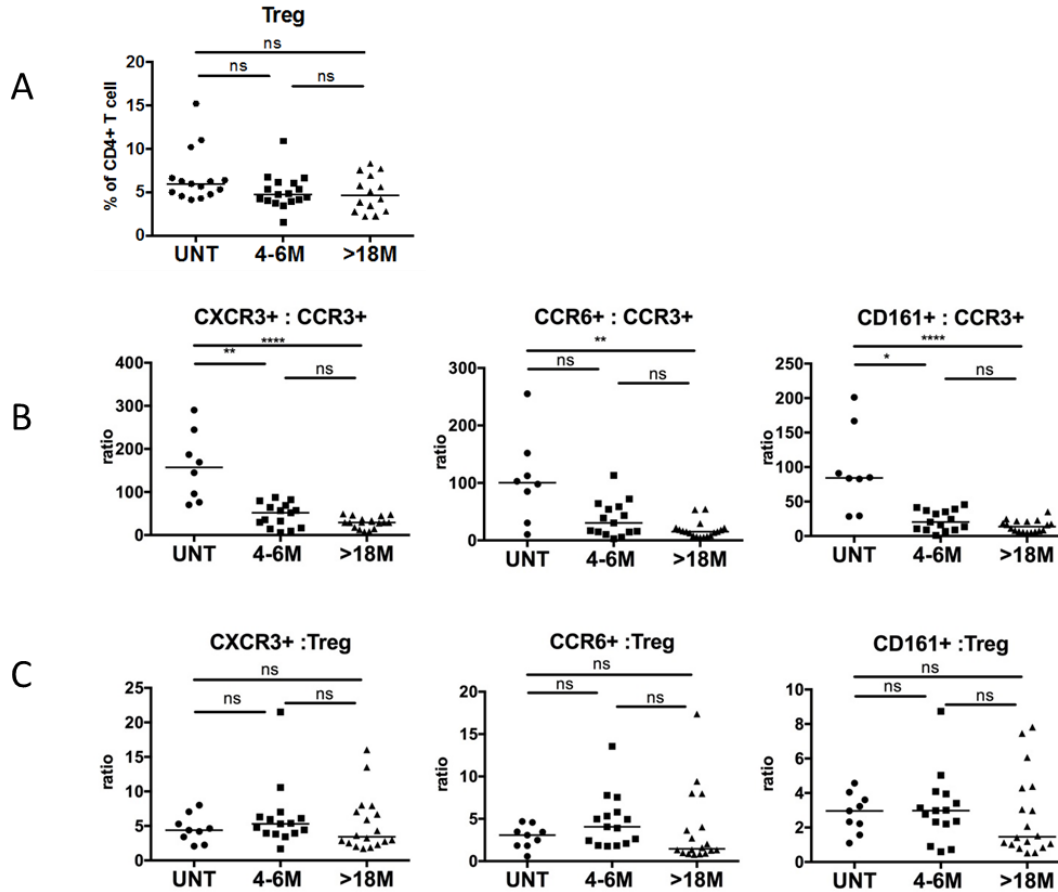

**Figure 2: DMF effect on Th and Treg subsets and ratios.** (A) DMF effect on Treg PBMC derived from untreated (UNT), 4-6 month DMF-treated (4-6M) and 18-26M DMF-treated (>18M) RRMS patients were stained with fluorochrome-conjugated antibodies against CD3, CD4, and CD25 followed by intracellular staining of fluorochrome-conjugated anti-human FOXP3 and analyzed by flow cytometry. The Treg (CD25<sup>+</sup>FOXP3<sup>+</sup>) of total CD4<sup>+</sup> T cells were analyzed at three time point (UNT: n=15, 4-6M: n=17, >18M: n=14). (B) DMF effect on Th1/Th17:Th2 ratios: PBMC derived from untreated (UNT), 4-6 month DMF-treated (4-6M) and 18-26M DMF-treated (>18M) RRMS patients were stained with fluorochrome-conjugated antibodies against CD3, CD4, CXCR3, CD161, CCR6 and CCR3 and analyzed by flow cytometry. Th1:Th2 ratio was calculated using CXCR3<sup>+</sup>% divided by CCR3<sup>+</sup>% in CD4<sup>+</sup> T cells (left panel); Th17:Th2 ratio was calculated using CCR6<sup>+</sup>% divided by CCR3<sup>+</sup>% in CD4<sup>+</sup> T cells (middle panel). The ratio of CD161<sup>+</sup>:Th2 was also calculated (right panel). Each dot represents the ratio from an individual patient. Upper panel is the cross-sectional analysis (UNT: n=8; 4-6M: n=15 and >18M: n=18). (C) DMF effect on Th1/Th17 : Treg cells ratio Th1:Treg ratio was calculated using CXCR3<sup>+</sup>% divided by CD25<sup>+</sup>FOXP3<sup>+</sup> Treg% in CD4<sup>+</sup> T cells (left lower panel); Th17: Treg ratio was calculated using CCR6<sup>+</sup>% divided by Treg% in CD4<sup>+</sup> T cells (middle lower panel). The ratio of CD161<sup>+</sup>:Treg was also calculated (right lower panel). Each dot represents the ratio from an individual patient. Upper panel is the cross-sectional analysis (UNT: n=9; 4-6M: n=15 and >18M: n=18). *P*-values from Kruskal-Wallis ANOVA with Dunn's multiple comparison tests are shown above the data for each cell type group. \**P* < 0.05; \*\**P* < 0.01; \*\*\**P* < 0.001; ns, not significant.

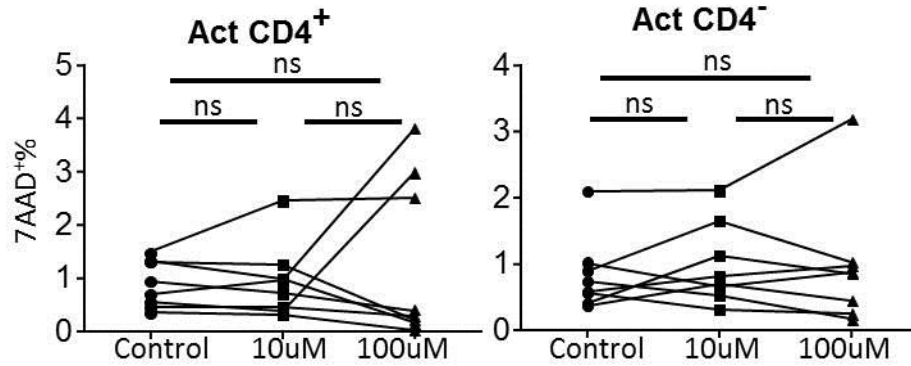

**Figure 3: Cell Death of activated T cells *in vitro*** PBMCs from 8 healthy donors were activated by anti-plate- coated anti-CD3 and soluble anti-CD28 in complete RPMI with or without 10 $\mu$ M or 100 $\mu$ M of DMF for 48 hours. Cells were harvested, washed and surface stained with fluorochrome-conjugated antibodies against CD3, CD8, CD4, as well as 7AAD and Annexin V and analyzed by flow cytometry. Large (FSC-A<sup>hi</sup>) CD3<sup>+</sup> T cell blasts were gated as activated T cells. The percentage of dead cells measured by positive staining of 7AAD in activated CD4<sup>+</sup> T cells (left panel) and CD4<sup>-</sup> T cells (right panel) populations.
